# Supplementary material for: Distinct and complementary roles for Aspergillus fumigatus-specific Tr1 and Foxp3+ regulatory T cells in humans and mice
Source: PubMed Central journal article supplement — Immunol Cell Biol. 2014 May 13;92(8):659–70. doi: 10.1038/icb.2014.34 (PMC4168117; doi:10.1038/icb.2014.34), 2014-05-13
Supplement: icb201434x1.pdf [file icb201434x1.pdf]

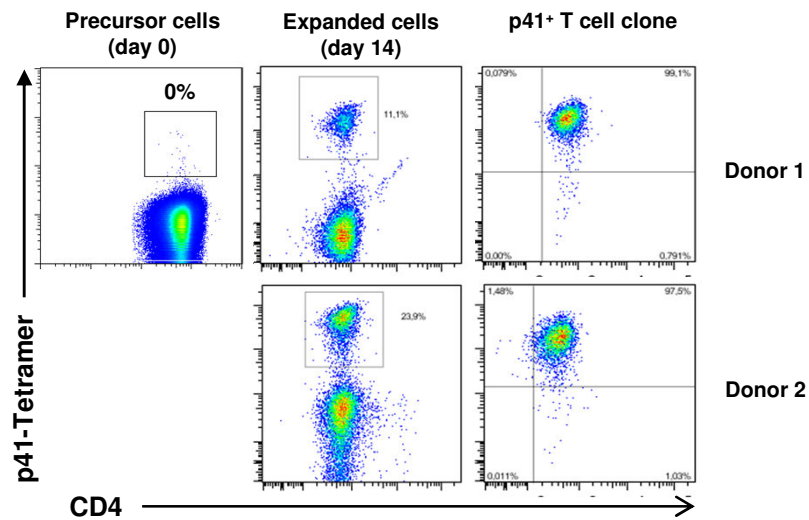

**Supplemental Figure 1: Generation of Crf-1/p41-specific CD4<sup>+</sup> T cell clones.** CD4<sup>+</sup>p41<sup>+</sup> T clones were expanded from CD154<sup>+</sup> T cells. After 14 days p41-tetramer<sup>+</sup> T cells were enriched using MACS prior cloning by limiting dilution. Dotplots show % tetramer<sup>+</sup> CD4<sup>+</sup> T cells in the peripheral blood (day 0), after 14 days of expansion, and after cloning.
