# Supplementary material for: Distinct and complementary roles for Aspergillus fumigatus-specific Tr1 and Foxp3+ regulatory T cells in humans and mice
Source: PubMed Central journal article supplement — Immunol Cell Biol. 2014 May 13;92(8):659–70. doi: 10.1038/icb.2014.34 (PMC4168117; doi:10.1038/icb.2014.34), 2014-05-13
Supplement: icb201434x2.pdf [file icb201434x2.pdf]

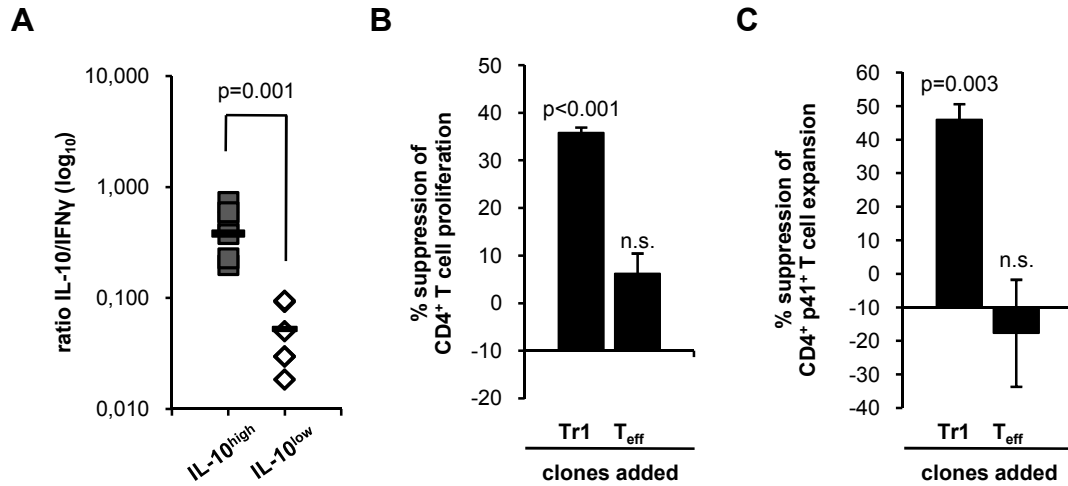

**Supplemental Figure 2: Human p41<sup>+</sup> Tr1 cells can be expanded from PBMC without polarizing conditions.** p41<sup>+</sup> T cell clones were generated in the presence of 5 IU/ml IL-2 prior limiting dilution. (A) Ratio of IL-10-to-IFN- $\gamma$  release  $\pm$  SD by IL-10<sup>high</sup> and IL-10<sup>low</sup> CD4<sup>+</sup>p41<sup>+</sup> T cell clones was determined as described in Figure 1A ( $n=6$  per group; 2 donors). (B) The diagram summarizes % suppression of T<sub>conv</sub> proliferation  $\pm$  SD ( $n=3$  per group; 2 donors) and (C) suppression of CFSE<sup>+</sup>CD4<sup>+</sup>p41<sup>+</sup> T cell expansion by Tr1 and T<sub>eff</sub> clones ( $n=3$  per group; 2 donors). Suppression assays were performed as described in Figure 2.
