# Supplementary material for: Distinct and complementary roles for Aspergillus fumigatus-specific Tr1 and Foxp3+ regulatory T cells in humans and mice
Source: PubMed Central journal article supplement — Immunol Cell Biol. 2014 May 13;92(8):659–70. doi: 10.1038/icb.2014.34 (PMC4168117; doi:10.1038/icb.2014.34), 2014-05-13
Supplement: icb201434x3.pdf [file icb201434x3.pdf]

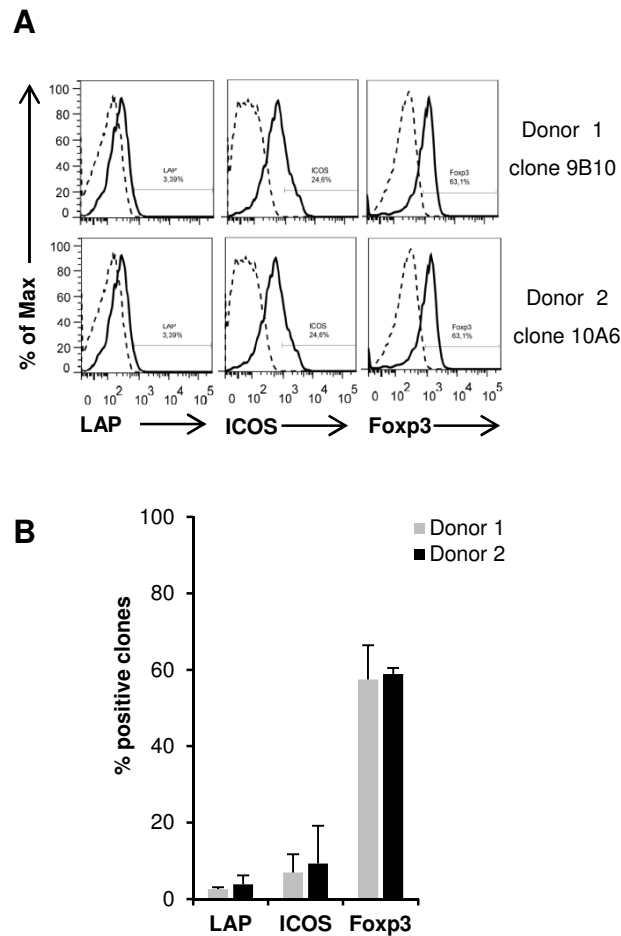

**Supplemental Figure 3: LAP, ICOS, and Foxp3 expression on CMV-specific T cell clones.** (A) Histograms show expression of LAP, ICOS, and Foxp3 by one T cell clone specific for the CMV-peptide pool (donor 1) and CMV<sub>283-297</sub> peptide (donor 2) after 24h of antigen-specific reactivation (solid lines; dashed lines: isotype controls). (B) The diagram summarizes the percentage  $\pm$  SD of LAP, ICOS, and Foxp3 expressing T cell clones (n=3 per donor).
