# Supplementary material for: Distinct and complementary roles for Aspergillus fumigatus-specific Tr1 and Foxp3+ regulatory T cells in humans and mice
Source: PubMed Central journal article supplement — Immunol Cell Biol. 2014 May 13;92(8):659–70. doi: 10.1038/icb.2014.34 (PMC4168117; doi:10.1038/icb.2014.34), 2014-05-13
Supplement: icb201434x4.pdf [file icb201434x4.pdf]

**Supplemental Table 1: Cytokine production by p41<sup>+</sup> CD4 T cell clones**

| Donor | Clone #                                  | Cytokine production (pg/ml) |               |      |     |
|-------|------------------------------------------|-----------------------------|---------------|------|-----|
|       |                                          | IL-10                       | IFN- $\gamma$ | IL-4 |     |
| 1     | <b>IL-10<sup>low</sup></b> <sup>1)</sup> | 7H2                         | 113           | 2840 | 2   |
|       |                                          | 8H10                        | 63            | 1539 | 5   |
|       |                                          | 7A8                         | 370           | 2762 | 2   |
| 2     |                                          | 3D2                         | 391           | 3118 | 327 |
|       |                                          | 9c5                         | 718           | 3525 | 1   |
|       |                                          | 3D4                         | 640           | 4339 | 1   |
| 3     |                                          | 5G5                         | 50            | 854  | 1   |
|       |                                          | 10A9                        | 4             | 750  | 131 |
|       |                                          | 10H9                        | 86            | 818  | 2   |
| 1     | <b>IL-10<sup>high</sup></b>              | 5H1                         | 1072          | 93   | 1   |
|       |                                          | 10F3                        | 1512          | 527  | 17  |
|       |                                          | 5B12                        | 1734          | 823  | 66  |
| 2     |                                          | 1H10                        | 1585          | 2762 | 0   |
|       |                                          | 9H11                        | 1390          | 3268 | 13  |
|       |                                          | 3F2                         | 1122          | 3017 | 6   |
| 3     |                                          | 4G2                         | 1436          | 997  | 42  |
|       |                                          | 8H9                         | 1157          | 1624 | 0   |

p41<sup>+</sup> CD4<sup>+</sup> T cell clones were restimulated with peptide-pulsed DC for 48h.

Thereafter, production of the cytokines IL-10, IFN- $\gamma$ , and IL-4 was determined from culture supernatant by CBA. <sup>1)</sup> p41<sup>+</sup> T cell clones were subdivided by low and high IL-10-to-IFN- $\gamma$  production.
